# Supplementary material for: Interfacial energy band engineered CsPbBr3/NiFe-LDH heterostructure catalysts with tunable visible light driven photocatalytic CO2 reduction capability
Source: Royal Society of Chemistry journal article supplement (doi:10.1039/d2cy01982e), 2022-12-22
Supplement: d2cy01982e1.pdf [file d2cy01982e1.pdf]

## Supporting Information

*Interfacial energy band engineered CsPbBr<sub>3</sub>/NiFe-LDH heterostructure catalyst with tunable visible light driven photocatalytic CO<sub>2</sub> reduction capability*

*Haoyue Sun<sup>a</sup>, Rui Tang<sup>\*a</sup>, Xingmo Zhang<sup>a, b</sup>, Shuzhen Zhang<sup>a</sup>, Wenjie Yang<sup>a</sup>, Lizhuo Wang<sup>a</sup>, Weibin Liang<sup>a</sup>, Fengwang Li<sup>a</sup>, Rongkun Zheng<sup>b</sup> and Jun Huang<sup>\*a</sup>*

<sup>a</sup> School of Chemical and Biomolecular Engineering, Sydney Nano Institute, The University of Sydney, New South Wales 2006, Australia

<sup>b</sup> School of Physics, Sydney Nano Institute, The University of Sydney, New South Wales, 2006, Australia

\* Corresponding authors

Dr. Rui Tang, E-mail: rui.tang2@sydney.edu.au

Prof. Jun Huang, E-mail: jun.huang@sydney.edu.au

# 1. Experimental

## 1.2 Chemical and reagents

Iron(II) sulfate heptahydrate ( $\text{FeSO}_4 \cdot 7\text{H}_2\text{O}$ , 99 wt%), nickel(II) sulfate hexahydrate ( $\text{NiSO}_4 \cdot 6\text{H}_2\text{O}$ , 99 wt%), urea (99 wt%), sodium citrate dihydrate ( $\text{Na}_3\text{C}_6\text{H}_5\text{O}_7 \cdot 2\text{H}_2\text{O}$ , 99 wt%), lead (II) bromide ( $\text{PbBr}_2$ , 99 wt%), cesium bromide ( $\text{CsBr}$ , 99 wt%), N, N-Dimethylmethanamide (DMF, 99 wt%), oleic acid (OA, 99 wt%), oleylamine (OAm, 98 wt%), toluene (99 wt%), ethyl acetate (EA, 99 wt%), and isopropanol (IPA, 70 wt% in  $\text{H}_2\text{O}$ ) were purchase from Sigma-Aldrich.

## 1.3 Characterization

The morphology was recorded on the Zeiss Auriga scanning electron microscopy (SEM) and JEOL 2200FS transmission electron microscopy (TEM). The X-ray diffraction (XRD) patterns were collected on a Rigaku D max-3C diffractometer using  $\text{Cu K}\alpha$  radiation. X-ray photoelectron spectroscopy (XPS) was performed on an ESCALAB 250Xi spectrometer (Thermo Fisher Scientific). Peaks fitting of the high-resolution data was carried out by Thermo Advantage 5.992 surface chemical analysis software. UV-vis absorption spectra were recorded with a UV-vis-NIR spectrophotometer (Shimadzu UV-3600). The steady-state photoluminescence (ss-PL) spectra of the samples were measured on a fluorescence spectrophotometer (Horiba Scientific). Time-resolved photoluminescence (TR-PL) spectra were measured using a 2x Single-Photon Avalanche Diodes detector (PicoQuant Microtime 200). The electrochemical test was studied on a standard three-electrode configuration, with the samples coated on FTO substrate as the working electrode, platinum plate as the counter electrode, and  $\text{Ag}/\text{AgCl}$  electrode as the reference electrode. A solution of 0.01 M tetrabutylammonium hexafluorophosphate (TBAPF6) was used as the electrolyte. The anodic and cathodic photocurrent tests were recorded on a CHI 660D electrochemical station under the illumination of a 150 W Xe lamp (Lamphouse CX-05E,  $\lambda > 420$  nm) at a potential of +0.3 V and -0.3 V vs.  $\text{Ag}/\text{AgCl}$ .

## 1.4 Catalytic test and product analysis

During the photocatalytic reduction, 5 mg as-synthesized catalysts powders were dispersed in 30 mL ethyl acetate and 460  $\mu$ L isopropanol was added as a sacrificial agent. The mixture was carried out in a 100 mL sealed autoclave and then vacuumed and filled with purity CO<sub>2</sub> gas to reach a 0.2 kPa pressure at an ambient temperature (298 K). A 300 W Xenon lamp (Lamphouse CX-05E) coupled with a 420 nm cut-off filter ( $\lambda > 420$  nm) was used as the light source to simulate the solar light irradiation. The gaseous products were sampled by a gas-tight syringe and analyzed by a gas chromatograph (GC-2060, Shanghai Ruimin Instrument Co., Ltd.) equipped with a thermal conductivity detector (TCD) and a flame ionization detector (FID). High purity Argon (99.99%) was used as the carrier gas. To assess the stability of the catalysts, three consecutive runs of photocatalytic CO<sub>2</sub> reduction (6 h in each run) were conducted. Between each run, the reactor was vacuumed and refilled with CO<sub>2</sub>.

## 2. Supporting figures

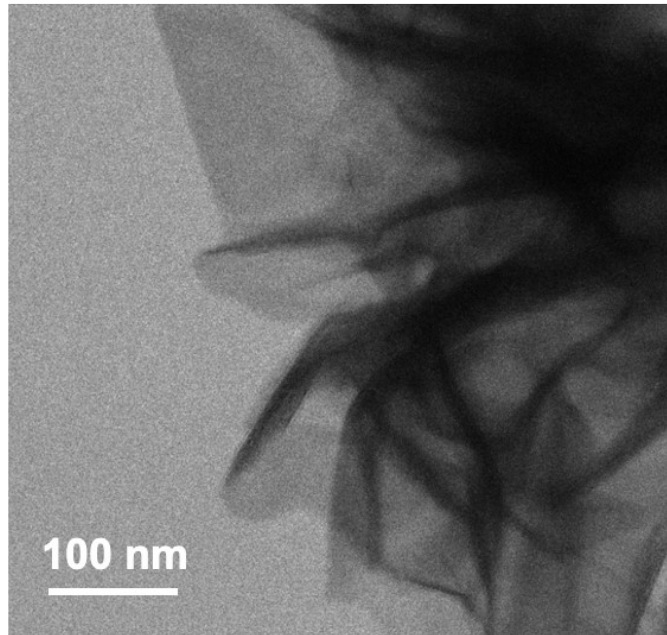

**Figure S1.** Characterization of TEM image of NiFe-LDH.

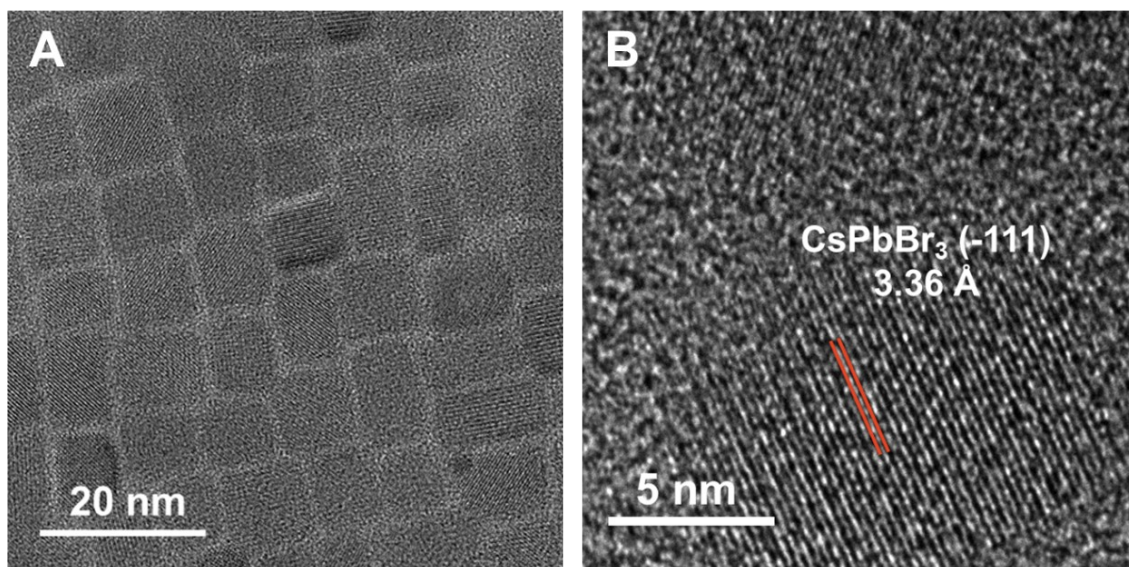

**Figure S2.** (A-B) TEM and HR-TEM images of CsPbBr<sub>3</sub> nanocrystals.

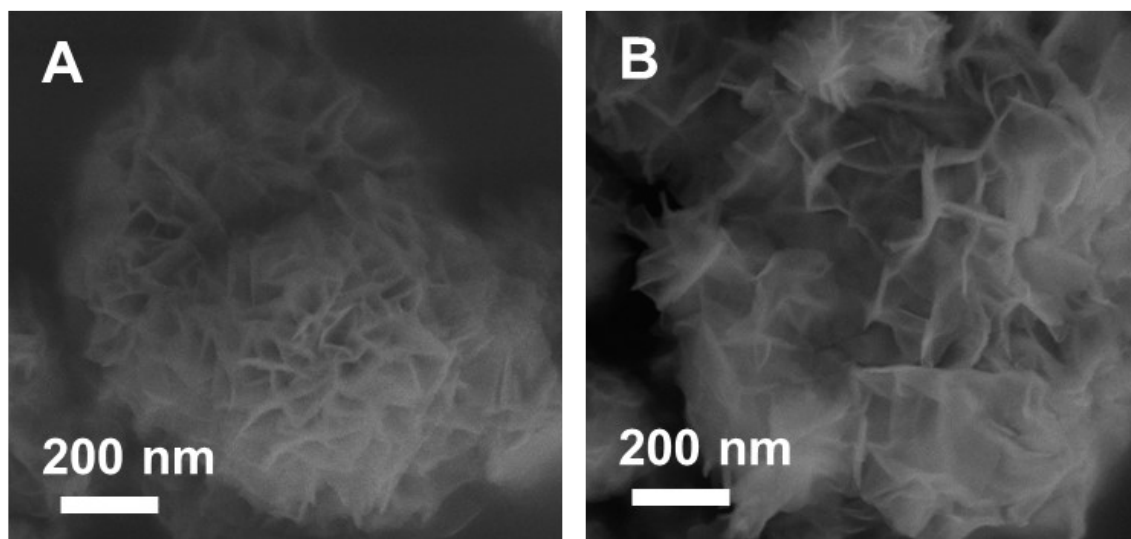

**Figure S3.** (A-B) SEM images CPB/NiFe-LDH-1 and CPB/NiFe-LDH-3 catalysts.

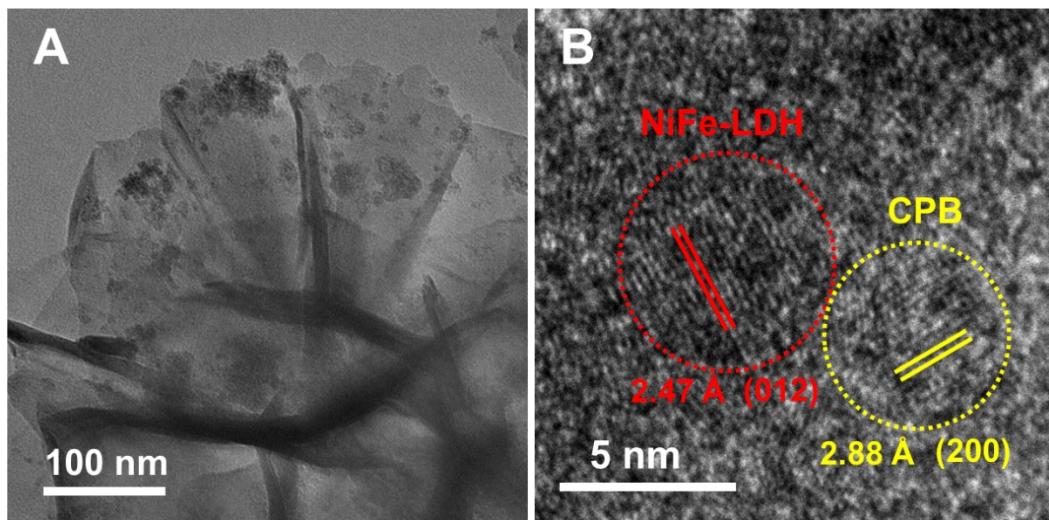

**Figure S4.** (A-B) TEM image and HR-TEM images of CPB/NiFe-LDH-2. The marked d-spacing of 2.88 Å and 2.47 Å can be indexed to the (200) plane of CPB and the (012) plane of NiFe-LDH, respectively.

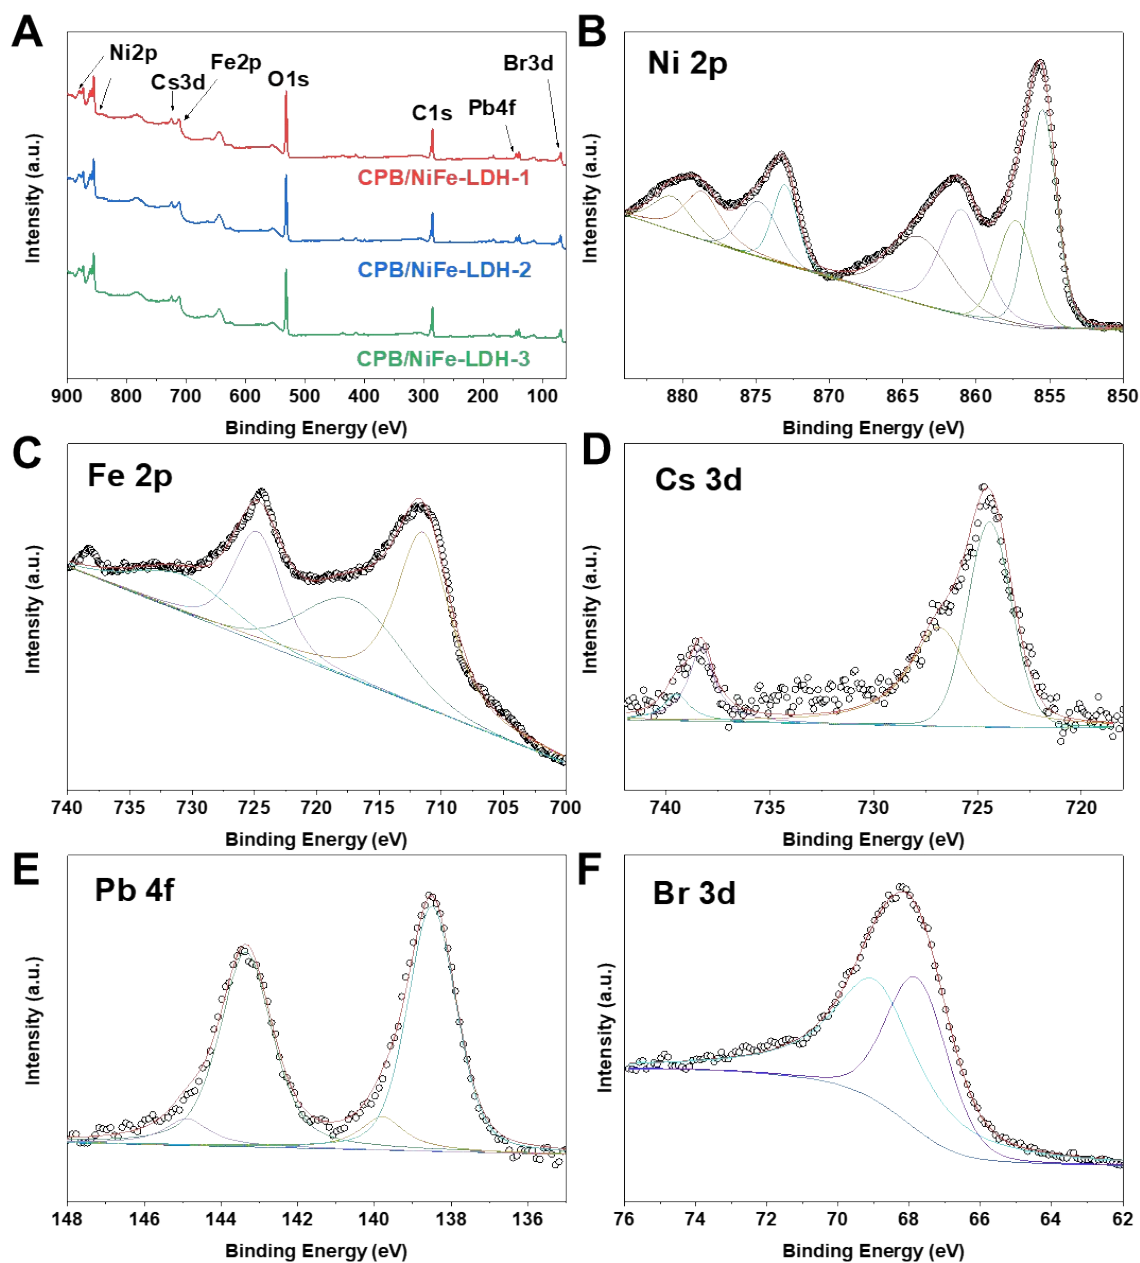

**Figure S5.** (A) XPS survey spectra of CPB/NiFe-LDH-1, CPB/NiFe-LDH-2 and CPB/NiFe-LDH-3. High-resolution XPS spectra of (B) Ni 2p, (C) Fe 2p, (D) Cs 3d, (E) Pb 4f, and (F) Br 3d.



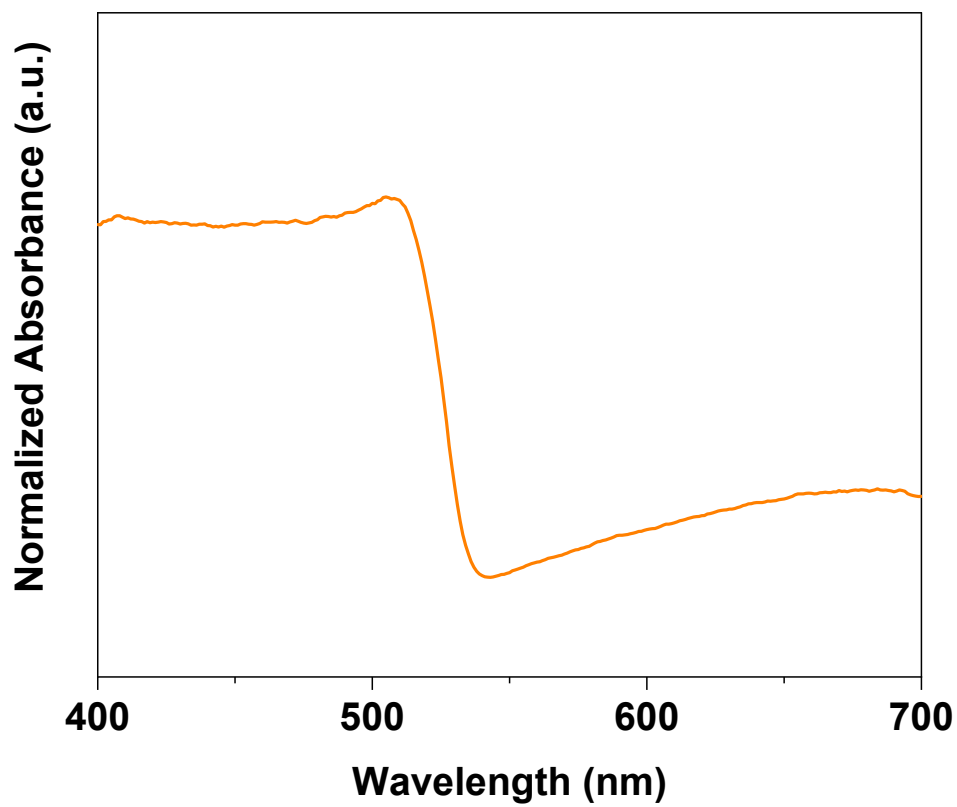

**Figure S6.** UV-vis absorption spectra of CPB.

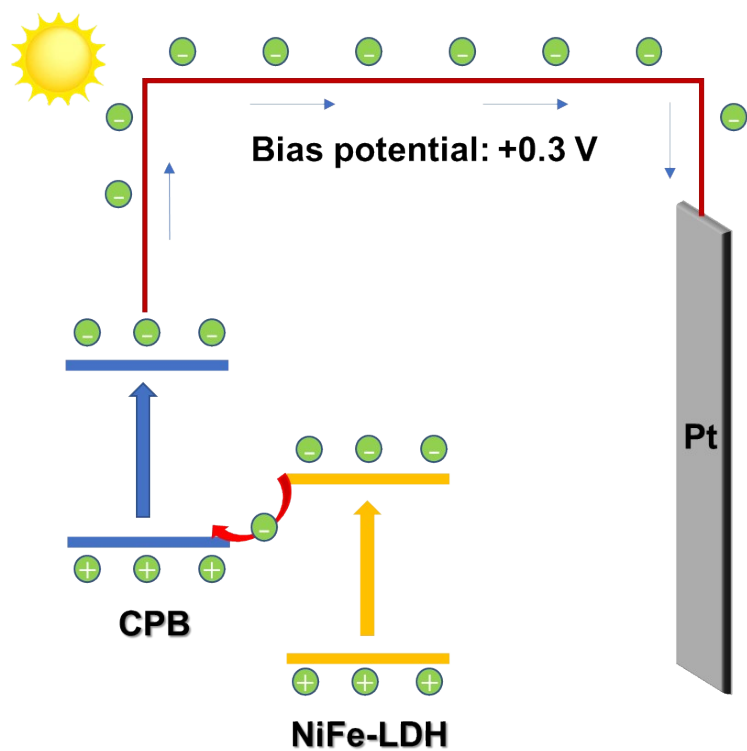

**Figure S7.** Scheme of the possible charge transfer direction in CPB/NiFe-LDH.

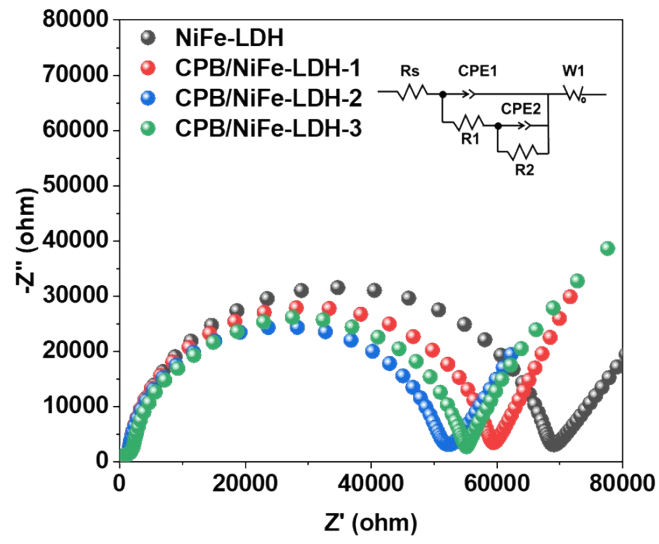

**Figure S8.** EIS plots of NiFe-LDH and CPB/NiFe-LDH- $x$  ( $x=1, 2, 3$ ).

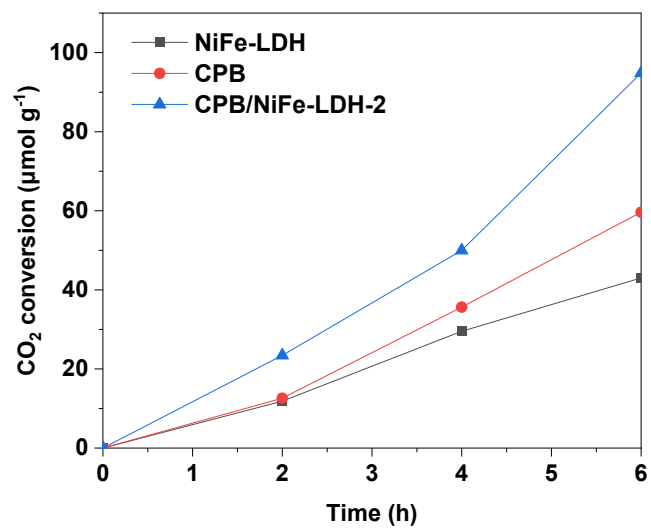

**Figure S9.** Time-online for photocatalytic CO<sub>2</sub> reduction of NiFe-LDH, CPB and CPB/NiFe-LDH-2.

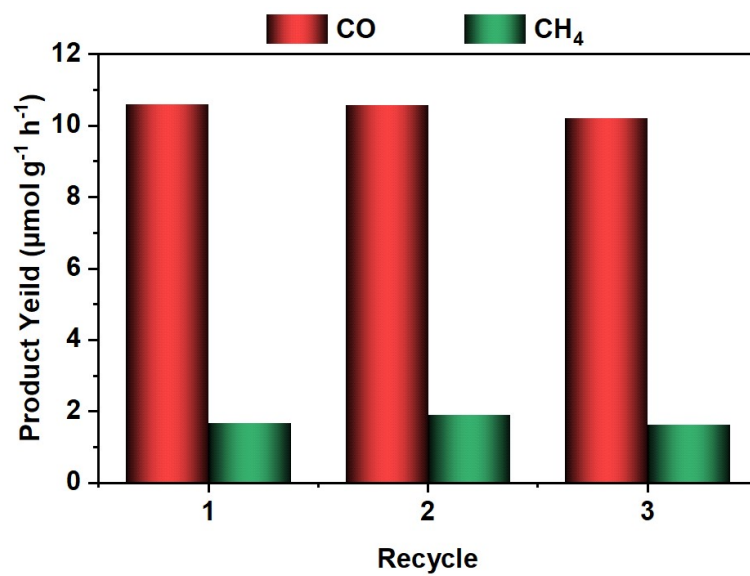

**Figure S10.** Recycling stability test of CPB/NiFe-LDH-2.

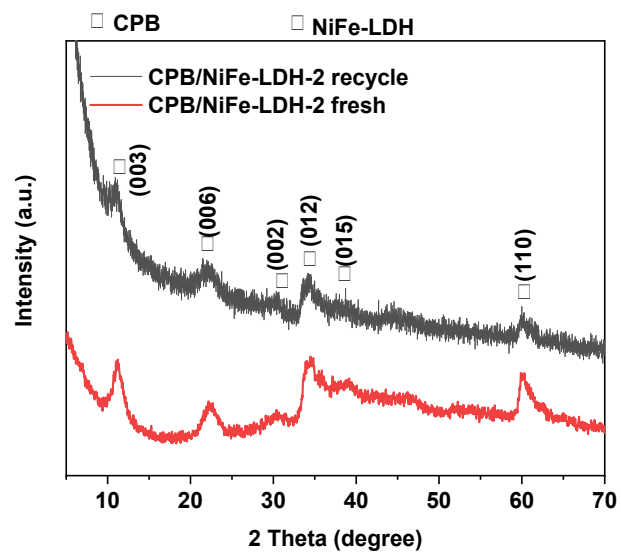

**Figure S11.** XRD pattern of CPB/NiFe-LDH-2 after 3 recycles and CPB/NiFe-LDH-2 fresh.

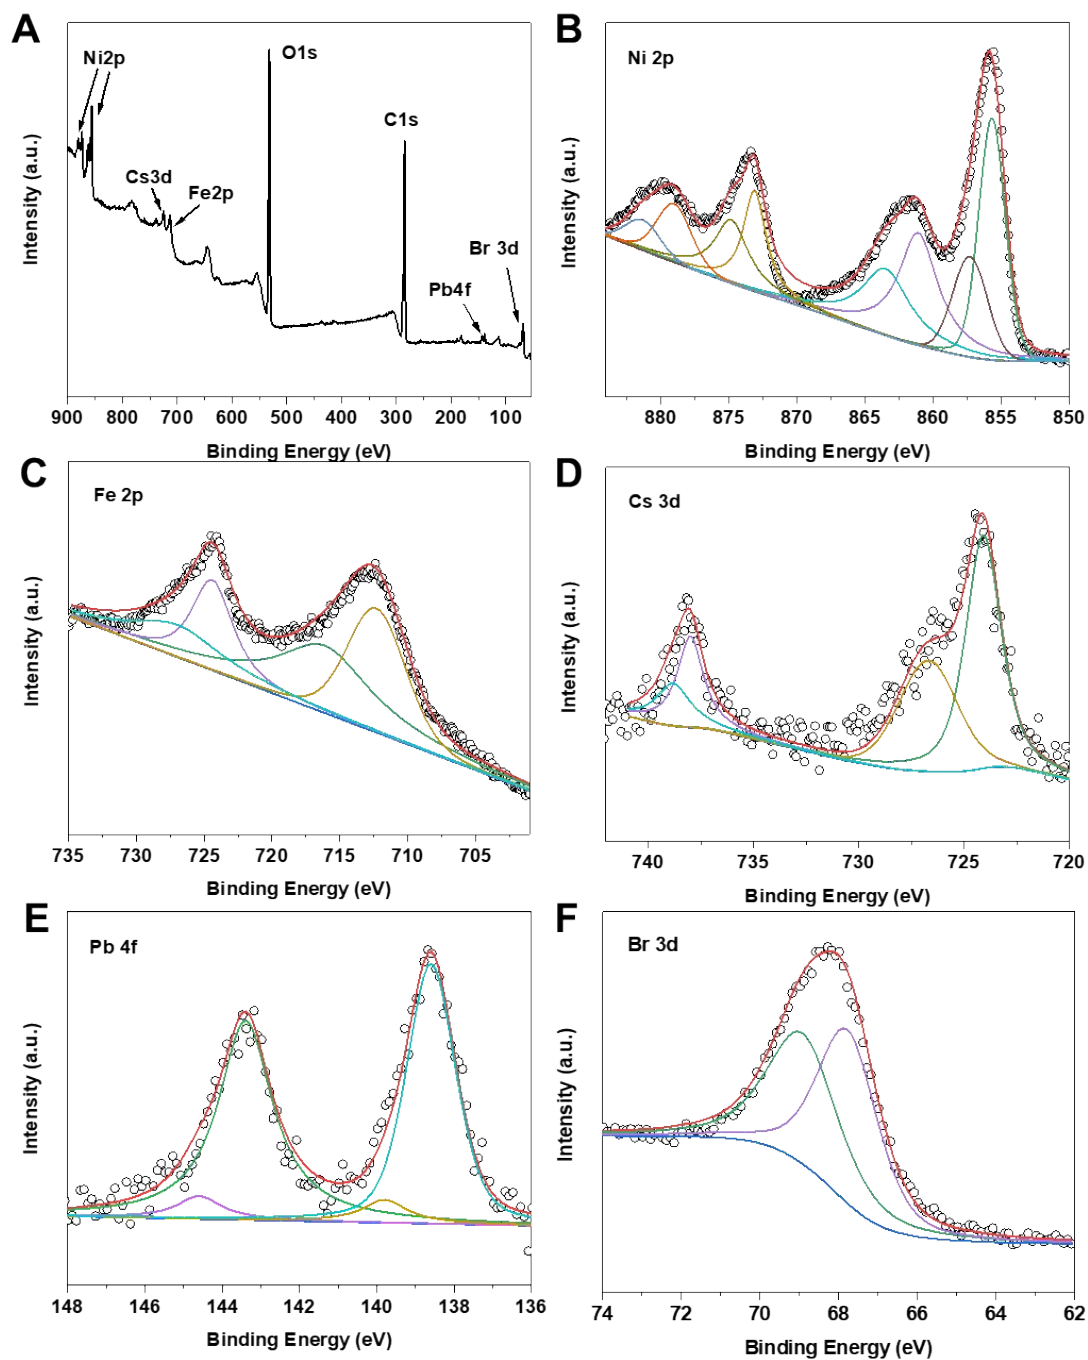

**Figure S12.** (A) XPS survey spectra of CPB/NiFe-LDH-2 and high-resolution XPS spectra of (B) Ni 2p, (C) Fe 2p, (D) Cs 3d, (E) Pb 4f, and (F) Br 3d after 3 cycles.

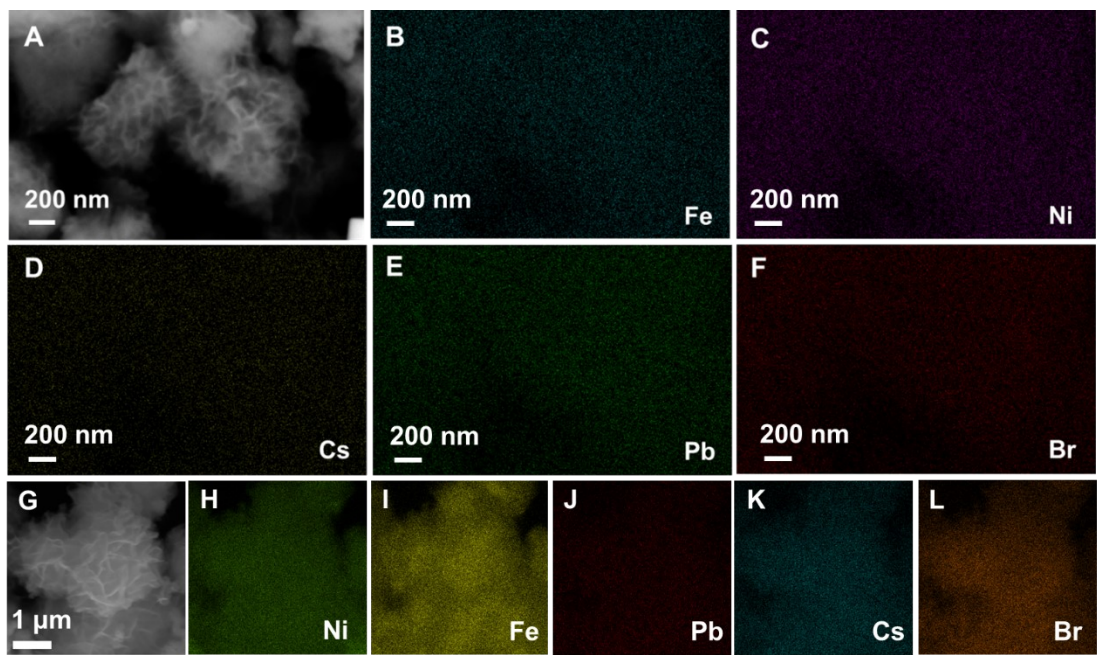

**Figure S13.** (A)SEM image, (B-F) EDS elements mapping images of CPB/NiFe-LDH-2 after 3 cycles, (G) SEM image, (H-L) EDS elements mapping images of CPB/NiFe-LDH-2 fresh.



### 3. Supporting Tables

**Table S1.** XPS atomic percentage analysis based on the survey spectra.

| Sample         | Atomic% |      |       |
|----------------|---------|------|-------|
|                | Ni      | Br   | Br/Ni |
| CPB/NiFe-LDH-1 | 5.91    | 2.71 | 0.46  |
| CPB/NiFe-LDH-2 | 5.93    | 3.33 | 0.56  |
| CPB/NiFe-LDH-3 | 5.92    | 3.65 | 0.62  |

**Table S2.** ICP analysis of CPB/NiFe-LDH-*x*.

| Sample         | wt%   |      |       |
|----------------|-------|------|-------|
|                | Fe    | Pb   | Pb/Fe |
| CPB/NiFe-LDH-1 | 14.54 | 4.34 | 0.29  |
| CPB/NiFe-LDH-2 | 15.69 | 5.42 | 0.35  |
| CPB/NiFe-LDH-3 | 12.68 | 5.79 | 0.46  |

**Table S3.** Photogenerated charge lifetimes of NiFe-LDH, CPB/NiFe-LDH-*x*.

| Sample         | $\tau_1$ (ns) | $\tau_2$ (ns) | $\tau_3$ (ns) | $\tau_{ave}$ |
|----------------|---------------|---------------|---------------|--------------|
| NiFe-LDH       | 0.33          | 0.12          | 3.89          | 0.59         |
| CPB/NiFe-LDH-1 | 0.34          | 0.10          | 4.75          | 1.55         |
| CPB/NiFe-LDH-2 | 1.60          | 0.34          | 6.99          | 3.89         |
| CPB/NiFe-LDH-3 | 0.60          | 0.13          | 6.83          | 3.41         |

**Table S4.** Comparison study of photocatalytic CO<sub>2</sub> reduction performance in this work and some latest reported perovskite-based photocatalysts towards CO<sub>2</sub> reduction.

| Catalyst                              | CO <sub>2</sub> Conversion Rate ( $\mu\text{mol h}^{-1} \text{g}^{-1}$ ) | Selectivity |                 |                | Reference |
|---------------------------------------|--------------------------------------------------------------------------|-------------|-----------------|----------------|-----------|
|                                       |                                                                          | CO          | CH <sub>4</sub> | H <sub>2</sub> |           |
| 0.1-Pt/ex-LDH                         | 2.64                                                                     | > 99 %      | -               | -              | Ref.[1]   |
| 20 wt% P25@CoAl-LDH                   | 2.21                                                                     | 94 %        | -               | 6 %            | Ref. [2]  |
| NiAl-LDH/CdS-2                        | 12.45                                                                    | 96 %        | 4 %             | -              | Ref. [3]  |
| 5% GO-LDH                             | 8.40                                                                     | 55 %        | 45 %            | -              | Ref. [4]  |
| CPB/MS (1.0 wt%)                      | 37.8                                                                     | 66 %        | 34 %            | -              | Ref. [5]  |
| CsPbBr <sub>3</sub> -GO NHSs          | 25.5                                                                     | 91.5 %      | -               | 8.5 %          | Ref. [6]  |
| TiO <sub>2</sub> /CsPbBr <sub>3</sub> | 6.72                                                                     | 95 %        | -               | 5%             | Ref. [7]  |
| CsPbBr <sub>3</sub> /GO               | 29.78                                                                    | 65 %        | 33 %            | 2 %            | Ref. [8]  |
| CsPbBr <sub>3</sub> @ZIF-67           | 29.63                                                                    | 18 %        | 82 %            | -              | Ref. [9]  |
| CPB/NiFe-LDH-2                        | 39.58                                                                    | 83 %        | 17 %            | -              | This work |

**Table S5.** Performance of photocatalysts towards CO<sub>2</sub> reduction.

| Catalysts       | AQY (%) |
|-----------------|---------|
| NiFe-LDH        | 0.38    |
| CPB             | 0.35    |
| CPB/ NiFe-LDH-1 | 0.42    |
| CPB/ NiFe-LDH-2 | 0.70    |
| CPB/ NiFe-LDH-3 | 0.47    |

The photocatalytic performance of pure NiFe-LDH, CPB and CPB/NiFe-LDH-x composites for CO<sub>2</sub> reduction were using a 300 W Xenon-arc lamp with a 420 nm cut-off filter ( $\lambda > 420$  nm) to simulate visible-light irradiation. For a typical test in photocatalytic CO<sub>2</sub> reduction, 5 mg photocatalyst was suspended in 30 mL ethyl acetate and 460  $\mu$ L isopropanol. The obtained solution was vacuum-treated for 10 min. Then the suspension was filled with CO<sub>2</sub> for 10 min to reach the equilibrium of adsorption-desorption. The catalyst suspension was illuminated for 6 h. The average power intensity of the incident light was measured to be 1.5W by a photometer. The number of incident photons (N) is calculated by Equation 1. The gas chromatograph (GC-2010, SHIMADZU, Japan) was used to test the products in our test. The apparent quantum yield (AQY) at 420 nm wavelength was estimated via the following Equation 2:

$$N = \frac{E\lambda}{hc} = \frac{1.5 \times 6 \times 3600 \times 420 \times 10^{-9}}{6.626 \times 10^{-34} \times 3 \times 10^8} = 6.85 \times 10^{22} \quad \text{(Equation 1)}$$

1)

$$AQY_{CO_2 \text{ Reduction}}(\%) = \frac{2 \times \text{number of CO} + 8 \times \text{number of CH}_4}{\text{number of incident photons}} \quad \text{(Equation 2)}$$

## 4. Reference

- [1] J. Xu, X. Liu, Z. Zhou, L. Deng, L. Liu, M. Xu, Platinum Nanoparticles with Low Content and High Dispersion over Exfoliated Layered Double Hydroxide for Photocatalytic CO<sub>2</sub> Reduction, *Energy Fuels*, 35 (2021) 10820-10831.
- [2] S. Kumar, M.A. Isaacs, R. Trofimovaite, L. Durndell, C.M.A. Parlett, R.E. Douthwaite, B. Coulson, M.C.R. Cockett, K. Wilson, A.F. Lee, P25@CoAl layered double hydroxide heterojunction nanocomposites for CO<sub>2</sub> photocatalytic reduction, *Appl. Catal. B.*, 209 (2017) 394-404.
- [3] X. Zhang, Y. Yang, L. Xiong, T. Wang, Z. Tang, P. Li, N. Yin, A. Sun, J. Shen, 3D dahlia-like NiAl-LDH/CdS heterosystem coordinating with 2D/2D interface for efficient and selective conversion of CO<sub>2</sub>, *Chin. Chem. Lett.*, (2021).
- [4] K. Wang, C. Miao, Y. Liu, L. Cai, W. Jones, J. Fan, D. Li, J. Feng, Vacancy enriched ultrathin TiMgAl-layered double hydroxide/graphene oxides composites as highly efficient visible-light catalysts for CO<sub>2</sub> reduction, *Appl. Catal. B*, 270 (2020) 118878.
- [5] X. Wang, J. He, L. Mao, X. Cai, C. Sun, M. Zhu, CsPbBr<sub>3</sub> perovskite nanocrystals anchoring on monolayer MoS<sub>2</sub> nanosheets for efficient photocatalytic CO<sub>2</sub> reduction, *Chem. Eng. J.*, 416 (2021) 128077.
- [6] Y.-H. Chen, J.-K. Ye, Y.-J. Chang, T.-W. Liu, Y.-H. Chuang, W.-R. Liu, S.-H. Liu, Y.-C. Pu, Mechanisms behind photocatalytic CO<sub>2</sub> reduction by CsPbBr<sub>3</sub> perovskite-graphene-based nanoheterostructures, *Appl. Catal. B*, 284 (2021) 119751.
- [7] F. Xu, K. Meng, B. Cheng, S. Wang, J. Xu, J. Yu, Unique S-scheme heterojunctions in self-assembled TiO<sub>2</sub>/CsPbBr<sub>3</sub> hybrids for CO<sub>2</sub> photoreduction, *Nat. Commun.*, 11 (2020) 4613.
- [8] Y.-F. Xu, M.-Z. Yang, B.-X. Chen, X.-D. Wang, H.-Y. Chen, D.-B. Kuang, C.-Y. Su, A CsPbBr<sub>3</sub> Perovskite Quantum Dot/Graphene Oxide Composite for Photocatalytic CO<sub>2</sub> Reduction, *JACS*, 139 (2017) 5660-5663.
- [9] Z.-C. Kong, J.-F. Liao, Y.-J. Dong, Y.-F. Xu, H.-Y. Chen, D.-B. Kuang, C.-Y. Su, Core@Shell CsPbBr<sub>3</sub>@Zeolitic Imidazolate Framework Nanocomposite for Efficient Photocatalytic CO<sub>2</sub> Reduction, *ACS Energy Lett.*, 3 (2018) 2656-2662.
